# Supplementary material for: Predicting outcome after cardiac resynchronisation therapy defibrillator implantation: the cardiac resynchronisation therapy defibrillator Futility score
Source: HighWire-hosted journal article supplement (doi:10.1136/heartjnl-2021-320532), 2022-04-11
Supplement: heartjnl-2021-320532supp001_data_supplement.pdf [file heartjnl-2021-320532supp001_data_supplement.pdf]

## Predicting Outcome After Cardiac Resynchronization Therapy Defibrillator Implantation: The CRT-D Futility Score

**Brief Title:** CRT-D Futility Score

Baptiste Maille, MD,<sup>a,b,c</sup> Alexandre Bodin, MD,<sup>d</sup> Arnaud Bisson, MD,<sup>d</sup> Julien Herbert, MSc,<sup>d,e</sup> Bertrand Pierre, MD,<sup>d</sup> Nicolas Clementy, MD,<sup>d</sup> Victor Klein MScRes,<sup>a</sup> Frédéric Franceschi, MD, PhD,<sup>a,b,c</sup> Jean Claude Deharo, MD,<sup>a,b,c</sup> Laurent Fauchier, MD<sup>d</sup>

### Online Appendix

This appendix has been provided by the authors to give readers additional information about their work.

Supplement to: Maille B, Bodin, A, Bisson A, et al. Predicting Outcome After Cardiac Resynchronization Therapy Defibrillator Implantation: The CRT-D Futility Score

**ACKNOWLEDGEMENTS** Sophie Rushton-Smith, PhD (MedLink Healthcare Communications, London) provided editorial assistance (limited to editing for style, referencing, and figure and table editing) and was funded by authors.

### Contents

|                                                                                                                                                                                                                                                                                 |   |
|---------------------------------------------------------------------------------------------------------------------------------------------------------------------------------------------------------------------------------------------------------------------------------|---|
| ONLINE TABLE 1. Codes in the 10th revision of the International Classification of Diseases (ICD-10) or in the classification commune des actes médicaux (CCAM, French classification for medical procedures) for diseases and comorbidities.....                                | 2 |
| ONLINE TABLE 2 Baseline Characteristics of Patients Implanted With CRT in French Hospitals (2010 to 2019) With at Least 1 Year of Follow-Up, According to CRT-P or CRT-D Device .....                                                                                           | 4 |
| ONLINE TABLE 3 Baseline Characteristics of Patients Implanted With CRT-D in French Hospitals (2010 to 2019) With at Least 1 Year of Follow-Up in the Derivation and Validation Samples.....                                                                                     | 5 |
| ONLINE TABLE 4 Comparison of C-Statistics (95% CIs) for Different Risk Scoring Systems Predicting 1-Year All-Cause Death in Patients Treated With CRT-D in the Derivation and Validation Samples.....                                                                           | 6 |
| ONLINE TABLE 5 Sensitivity and Specificity for Different Risk Strata of the CRT-D Futility Score .....                                                                                                                                                                          | 7 |
| ONLINE FIGURE 1 Flow Chart .....                                                                                                                                                                                                                                                | 8 |
| ONLINE FIGURE 2 Upper panel: Area Under the Curve for the 3 Scores in Predicting Death at 1 Year for Patients With CRT-D Implantation, in the validation cohort. Lower panel: Decision Curve Analysis: Net Number of True Positives Gained Using Different Models Compared With |   |

No Model at a Range of Threshold Probabilities.....

ONLINE FIGURE 3 Odds Ratio for All-Cause Death at 1 Year in Patients Treated With CRT-D Versus CRT-P, Stratified by CRT-D Futility Score.....9

**ONLINE TABLE 1. Codes in the 10th revision of the International Classification of Diseases (ICD-10) or in the classification commune des actes médicaux (CCAM, French classification for medical procedures) for diseases and comorbidities.**

| <i>Diseases and comorbidities</i>     | <i>Codes in ICD-10 or CCAM</i>                                                                                                                                                                                                                                                                                                                                                                                                                                |
|---------------------------------------|---------------------------------------------------------------------------------------------------------------------------------------------------------------------------------------------------------------------------------------------------------------------------------------------------------------------------------------------------------------------------------------------------------------------------------------------------------------|
| <b>Hypertension</b>                   | I10, I11, I12, I13, I14, I15                                                                                                                                                                                                                                                                                                                                                                                                                                  |
| <b>Diabetes mellitus</b>              | E10, E11, E12, E13, E14                                                                                                                                                                                                                                                                                                                                                                                                                                       |
| <b>Heart failure</b>                  | I50, I11.0, I13.0, I13.2, J81, R570, I42, I43, I25.5                                                                                                                                                                                                                                                                                                                                                                                                          |
| <b>History of pulmonary oedema</b>    | R570, J81                                                                                                                                                                                                                                                                                                                                                                                                                                                     |
| <b>Aortic stenosis</b>                | I350, I352, I060, I062                                                                                                                                                                                                                                                                                                                                                                                                                                        |
| <b>Aortic regurgitation</b>           | I35.1                                                                                                                                                                                                                                                                                                                                                                                                                                                         |
| <b>Mitral regurgitation</b>           | I34.0                                                                                                                                                                                                                                                                                                                                                                                                                                                         |
| <b>Previous endocarditis</b>          | I330                                                                                                                                                                                                                                                                                                                                                                                                                                                          |
| <b>Dilated cardiomyopathy</b>         | I42, I43                                                                                                                                                                                                                                                                                                                                                                                                                                                      |
| <b>Coronary artery disease</b>        | I20, I21, I22, I23, I24, I25,<br>Z955, DDAF006, DDAF001, DDAF003, DDAF004, DDAF007,<br>DDAF008, DDAF009, DDAF010, Z951, DDMA003, DDMA004,<br>DDMA005, DDMA006, DDMA007, DDMA008, DDMA009,<br>DDMA011, DDMA012, DDMA013, DDMA015, DDMA016,<br>DDMA017, DDMA018, DDMA019, DDMA020, DDMA021,<br>DDMA022, DDMA023, DDMA024, DDMA025, DDMA026,<br>DDMA027, DDMA028, DDMA029, DDMA030, DDMA031,<br>DDMA032, DDMA033, DDMA034, DDMA035, DDMA036,<br>DDMA037, DDMA038 |
| <b>Previous myocardial infarction</b> | I21, I22, I23                                                                                                                                                                                                                                                                                                                                                                                                                                                 |
| <b>Previous PCI</b>                   | Z955, DDAF006, DDAF001, DDAF003, DDAF004, DDAF007,<br>DDAF008, DDAF009, DDAF010                                                                                                                                                                                                                                                                                                                                                                               |
| <b>Previous CABG</b>                  | Z951, DDMA003, DDMA004, DDMA005, DDMA006, DDMA007,<br>DDMA008, DDMA009, DDMA011, DDMA012, DDMA013,<br>DDMA015, DDMA016, DDMA017, DDMA018, DDMA019,<br>DDMA020, DDMA021, DDMA022, DDMA023, DDMA024,<br>DDMA025, DDMA026, DDMA027, DDMA028, DDMA029,<br>DDMA030, DDMA031, DDMA032, DDMA033, DDMA034,<br>DDMA035, DDMA036, DDMA037, DDMA038                                                                                                                      |
| <b>Atrial fibrillation</b>            | I48                                                                                                                                                                                                                                                                                                                                                                                                                                                           |
| <b>Left BBB</b>                       | I447                                                                                                                                                                                                                                                                                                                                                                                                                                                          |
| <b>Right BBB</b>                      | I451                                                                                                                                                                                                                                                                                                                                                                                                                                                          |
| <b>Vascular disease</b>               | I71, I790, I739, R02, Z958, Z959                                                                                                                                                                                                                                                                                                                                                                                                                              |
| <b>Ischaemic stroke</b>               | I63                                                                                                                                                                                                                                                                                                                                                                                                                                                           |
| <b>Intracranial bleeding</b>          | I60, I61, I62, S06.4, S06.5, S06.6                                                                                                                                                                                                                                                                                                                                                                                                                            |
| <b>Smoker</b>                         | I472                                                                                                                                                                                                                                                                                                                                                                                                                                                          |
| <b>Dyslipidaemia</b>                  | E78                                                                                                                                                                                                                                                                                                                                                                                                                                                           |
| <b>Obesity</b>                        | E65, E66                                                                                                                                                                                                                                                                                                                                                                                                                                                      |
| <b>Alcohol-related diagnoses</b>      | E24.4, F10, G31.2, G62.1, G72.1, I42.6, K29.2, K70, K86.0, O35.4,<br>P04.3, Q86.0, T51, Y90, Y91, Z50.2, Z71.4, Z72.1                                                                                                                                                                                                                                                                                                                                         |
| <b>Undernutrition</b>                 | E41, E43, E44, E46, F508, K912, R636                                                                                                                                                                                                                                                                                                                                                                                                                          |
| <b>Abnormal renal function</b>        | N18.3, N18.4, N18.5, T86.1, Z49, Z99.2                                                                                                                                                                                                                                                                                                                                                                                                                        |
| <b>Lung disease</b>                   | J40-J70, J96.1                                                                                                                                                                                                                                                                                                                                                                                                                                                |
| <b>Sleep apnoea syndrome</b>          | G47.3                                                                                                                                                                                                                                                                                                                                                                                                                                                         |

---

|                             |                                                                                                                             |
|-----------------------------|-----------------------------------------------------------------------------------------------------------------------------|
| <b>COPD</b>                 | J43, J44                                                                                                                    |
| <b>Liver disease</b>        | K70-K77                                                                                                                     |
| <b>Thyroid diseases</b>     | E0, E89.0                                                                                                                   |
| <b>Inflammatory disease</b> | M05-M14, M45, M46, K50, K51, K52                                                                                            |
| <b>Anaemia</b>              | D50-D64                                                                                                                     |
| <b>Previous cancer</b>      | C00-C97                                                                                                                     |
| <b>Cognitive impairment</b> | F00, F01, F02, F03, F106, F1073, F1173, F1273, F1373, F1473, F1573, F1673, F1773, F1873, F1973, G30, G310, G318, G938, I673 |

---

CABG = coronary artery bypass graft; COPD = chronic obstructive pulmonary disease; PCI = percutaneous coronary intervention.

**ONLINE TABLE 2 Baseline Characteristics of Patients Implanted with CRT in French Hospitals (2010 to 2019) With at Least 1 Year of Follow-Up, According to CRT-P or CRT-D Device**

|                                            | Total<br>(n=36015) | CRT-P<br>(n=12986) | CRT-D<br>(n=23029) | p       |
|--------------------------------------------|--------------------|--------------------|--------------------|---------|
| Age, years                                 | 71.7±10.8          | 78.7±8.6           | 67.7±9.9           | <0.0001 |
| Sex (male)                                 | 26,615 (73.9)      | 8,459 (65.1)       | 18,156 (78.8)      | <0.0001 |
| Hypertension                               | 22,183 (61.6)      | 8,734 (67.3)       | 13,449 (58.4)      | <0.0001 |
| Diabetes mellitus                          | 11,375 (31.6)      | 3,747 (28.9)       | 7,628 (33.1)       | <0.0001 |
| History of hospitalization with congestion | 29,218 (81.1)      | 10,457 (80.5)      | 18,761 (81.5)      | 0.03    |
| History of pulmonary oedema                | 2,504 (7.0)        | 932 (7.2)          | 1,572 (6.8)        | 0.21    |
| Dilated cardiomyopathy                     | 23,127 (64.2)      | 7,144 (55.0)       | 15,983 (69.4)      | <0.0001 |
| Coronary artery disease                    | 20,592 (57.2)      | 6,872 (52.9)       | 13,720 (59.6)      | <0.0001 |
| Previous myocardial infarction             | 3,176 (8.8)        | 1,021 (7.9)        | 2,155 (9.4)        | <0.0001 |
| Previous PCI                               | 8,585 (23.8)       | 2,673 (20.6)       | 5,912 (25.7)       | <0.0001 |
| Previous CABG                              | 3,846 (10.7)       | 1,163 (9.0)        | 2,683 (11.7)       | <0.0001 |
| Aortic stenosis                            | 2,750 (7.6)        | 1,671 (12.9)       | 1,079 (4.7)        | <0.0001 |
| Aortic regurgitation                       | 1,794 (5.0)        | 878 (6.8)          | 916 (4.0)          | <0.0001 |
| Mitral regurgitation                       | 6,535 (18.1)       | 2,639 (20.3)       | 3,896 (16.9)       | <0.0001 |
| Atrial fibrillation                        | 16,838 (46.8)      | 7,624 (58.7)       | 9,214 (40.0)       | <0.0001 |
| Left BBB                                   | 13,435 (37.3)      | 4,925 (37.9)       | 8,510 (37.0)       | 0.07    |
| Right BBB                                  | 1,682 (4.7)        | 690 (5.3)          | 992 (4.3)          | <0.0001 |
| Vascular disease                           | 11,209 (31.1)      | 3,642 (28.0)       | 7,567 (32.9)       | <0.0001 |
| Ischaemic stroke                           | 1,226 (3.4)        | 449 (3.5)          | 777 (3.4)          | 0.67    |
| Intracranial bleeding                      | 321 (0.9)          | 140 (1.1)          | 181 (0.8)          | 0.005   |
| Smoker                                     | 4,920 (13.7)       | 1,055 (8.1)        | 3,865 (16.8)       | <0.0001 |
| Dyslipidaemia                              | 13,255 (36.8)      | 4,554 (35.1)       | 8,701 (37.8)       | <0.0001 |
| Obesity                                    | 7,510 (20.9)       | 2,381 (18.3)       | 5,129 (22.3)       | <0.0001 |
| Alcohol-related diagnoses                  | 2,388 (6.6)        | 606 (4.7)          | 1,782 (7.7)        | <0.0001 |
| Undernutrition                             | 1,970 (5.5)        | 1,072 (8.3)        | 898 (3.9)          | <0.0001 |
| Chronic kidney disease                     | 4,303 (11.9)       | 2,102 (16.2)       | 2,201 (9.6)        | <0.0001 |
| Lung disease                               | 6,670 (18.5)       | 2,553 (19.7)       | 4,117 (17.9)       | <0.0001 |
| Sleep apnoea syndrome                      | 3,607 (10.0)       | 1,230 (9.5)        | 2,377 (10.3)       | 0.01    |
| Liver disease                              | 1,602 (4.4)        | 575 (4.4)          | 1,027 (4.5)        | 0.89    |
| Thyroid diseases                           | 3,865 (10.7)       | 1,740 (13.4)       | 2,125 (9.2)        | <0.0001 |
| Inflammatory disease                       | 2,310 (6.4)        | 993 (7.6)          | 1,317 (5.7)        | <0.0001 |
| Anaemia                                    | 4,213 (11.7)       | 2,032 (15.6)       | 2,181 (9.5)        | <0.0001 |
| Previous cancer                            | 3,742 (10.4)       | 1,749 (13.5)       | 1,993 (8.7)        | <0.0001 |
| Cognitive impairment                       | 648 (1.8)          | 429 (3.3)          | 219 (1.0)          | <0.0001 |

Values are n (%) or mean±SD. CABG = coronary artery bypass graft; CRT-D = cardiac resynchronization therapy defibrillator; CRT-P = cardiac resynchronization therapy pacemaker; BBB = bundle branch block; PCI = percutaneous coronary intervention; SD = standard deviation.

**ONLINE TABLE 3 Baseline Characteristics of Patients Implanted with CRT-D in French Hospitals (2010 to 2019) With at Least 1 Year of Follow-Up in the Derivation and Validation Samples.**

|                                            | Total<br>(n=23,029) | Derivation Cohort<br>(n=11,514) | Validation Cohort<br>(n=11,515) | p    |
|--------------------------------------------|---------------------|---------------------------------|---------------------------------|------|
| Age, years                                 | 67.7±9.9            | 67.8±9.9                        | 67.5±10.0                       | 0.02 |
| Sex (male)                                 | 18,156 (78.8)       | 9,098 (79.0)                    | 9,058 (78.7)                    | 0.51 |
| Hypertension                               | 13,449 (58.4)       | 6,747 (58.6)                    | 6,702 (58.2)                    | 0.54 |
| Diabetes mellitus                          | 7,628 (33.1)        | 3,802 (33.0)                    | 3,826 (33.2)                    | 0.74 |
| History of hospitalization with congestion | 18,761 (81.5)       | 9,393 (81.6)                    | 9,368 (81.4)                    | 0.66 |
| History of pulmonary oedema                | 1,572 (6.8)         | 807 (7.0)                       | 765 (6.6)                       | 0.27 |
| Dilated cardiomyopathy                     | 15,983 (69.4)       | 7,990 (69.4)                    | 7,993 (69.4)                    | 0.97 |
| Coronary artery disease                    | 13,720 (59.6)       | 6,904 (60.0)                    | 6,816 (59.2)                    | 0.23 |
| Previous myocardial infarction             | 2,155 (9.4)         | 1,103 (9.6)                     | 1,052 (9.1)                     | 0.25 |
| Previous PCI                               | 5,912 (25.7)        | 2,980 (25.9)                    | 2,932 (25.5)                    | 0.47 |
| Previous CABG                              | 2,683 (11.7)        | 1,369 (11.9)                    | 1,314 (11.4)                    | 0.26 |
| Aortic stenosis                            | 1,079 (4.7)         | 552 (4.8)                       | 527 (4.6)                       | 0.43 |
| Aortic regurgitation                       | 916 (4.0)           | 480 (4.2)                       | 436 (3.8)                       | 0.14 |
| Mitral regurgitation                       | 3,896 (16.9)        | 1,977 (17.2)                    | 1,919 (16.7)                    | 0.31 |
| Atrial fibrillation                        | 9,214 (40.0)        | 4,652 (40.4)                    | 4,562 (39.6)                    | 0.22 |
| Left BBB                                   | 8,510 (37.0)        | 4,275 (37.1)                    | 4,235 (36.8)                    | 0.58 |
| Right BBB                                  | 992 (4.3)           | 502 (4.4)                       | 490 (4.3)                       | 0.7  |
| Vascular disease                           | 7,567 (32.9)        | 3,806 (33.1)                    | 3,761 (32.7)                    | 0.52 |
| Ischaemic stroke                           | 777 (3.4)           | 387 (3.4)                       | 390 (3.4)                       | 0.91 |
| Intracranial bleeding                      | 181 (0.8)           | 84 (0.7)                        | 97 (0.8)                        | 0.33 |
| Smoker                                     | 3,865 (16.8)        | 1,970 (17.1)                    | 1,895 (16.5)                    | 0.19 |
| Dyslipidaemia                              | 8,701 (37.8)        | 4,295 (37.3)                    | 4,406 (38.3)                    | 0.13 |
| Obesity                                    | 5,129 (22.3)        | 2,508 (21.8)                    | 2,621 (22.8)                    | 0.07 |
| Alcohol-related diagnoses                  | 1,782 (7.7)         | 873 (7.6)                       | 909 (7.9)                       | 0.38 |
| Undernutrition                             | 898 (3.9)           | 471 (4.1)                       | 427 (3.7)                       | 0.13 |
| Chronic kidney disease                     | 2,201 (9.6)         | 1,108 (9.6)                     | 1,093 (9.5)                     | 0.74 |
| Lung disease                               | 4,117 (17.9)        | 2,067 (18.0)                    | 2,050 (17.8)                    | 0.77 |
| Sleep apnoea syndrome                      | 2,377 (10.3)        | 1,189 (10.3)                    | 1,188 (10.3)                    | 0.98 |
| Liver disease                              | 1,027 (4.5)         | 515 (4.5)                       | 512 (4.4)                       | 0.92 |
| Thyroid diseases                           | 2,125 (9.2)         | 1,047 (9.1)                     | 1,078 (9.4)                     | 0.48 |
| Inflammatory disease                       | 1,317 (5.7)         | 683 (5.9)                       | 634 (5.5)                       | 0.16 |
| Anaemia                                    | 2,181 (9.5)         | 1,100 (9.6)                     | 1,081 (9.4)                     | 0.67 |
| Previous cancer                            | 1,993 (8.7)         | 990 (8.6)                       | 1,003 (8.7)                     | 0.76 |
| Cognitive impairment                       | 219 (1.0)           | 113 (1.0)                       | 106 (0.9)                       | 0.63 |

Values are n (%) or mean±SD. CABG = coronary artery bypass graft; CRT-D = cardiac resynchronization therapy defibrillator; CRT-P = cardiac resynchronization therapy pacemaker; BBB = bundle branch block; PCI = percutaneous coronary intervention; SD = standard deviation.

**ONLINE TABLE 4 Comparison of C-Statistics (95% CIs) for Different Risk Scoring Systems Predicting 1-Year All-Cause Death in Patients Treated With CRT-D in the Derivation and Validation Samples**

|                              | <b>C-statistics (95% CI)</b> | <b>p Value*</b> | <b>p Value†</b> |
|------------------------------|------------------------------|-----------------|-----------------|
| Derivation sample (n=11,514) |                              |                 |                 |
| Goldenberg score             | 0.649 (0.631–0.668)          |                 | <0.0001         |
| EAARN score                  | 0.683 (0.665–0.700)          | <0.0001         |                 |
| CRT-D Futility score         | 0.716 (0.698–0.734)          | <0.0001         | <0.0001         |
| Validation sample (n=11,515) |                              |                 |                 |
| Goldenberg score             | 0.637 (0.618–0.656)          |                 | <0.0001         |
| EAARN score                  | 0.667 (0.649–0.686)          | <0.0001         |                 |
| Futility CRT-D score         | 0.692 (0.673–0.710)          | <0.0001         | <0.0001         |

\*p value for the DeLong test vs. the Goldenberg score. †p value for the DeLong test vs. the EAARN score. CI = confidence interval; CRT-D = cardiac resynchronization therapy defibrillator EAARN = Ejection fraction, Age, Atrial fibrillation, Renal dysfunction, New York Heart Association class IV.

**ONLINE TABLE 5 Sensitivity and Specificity for Different Risk Strata of the CRT-D Futility Score**

| <b>Cut point</b> | <b>Sensitivity</b> | <b>Specificity</b> | <b>Correctly classified</b> | <b>LR+</b> | <b>LR-</b> |
|------------------|--------------------|--------------------|-----------------------------|------------|------------|
| Low              | 100.0%             | 0.0%               | 7.0%                        | 1          |            |
| Medium low       | 95.9%              | 17.4%              | 22.9%                       | 1.161      | 0.236      |
| Medium high      | 76.6%              | 52.7%              | 54.3%                       | 1.618      | 0.445      |
| High             | 37.8%              | 85.7%              | 82.4%                       | 2.650      | 0.725      |

For the CRT-D Futility score, risk was defined as: Low = score 0–3; Medium low = score 4–7; Medium high = score 8–11; and High = score  $\geq 12$ . LR+ = positive likelihood ratio; LR- = negative likelihood ratio.



**ONLINE TABLE 6 Net reclassification after adding the CRT-D Futility Score for 1-year risk of all-cause death.**

|            | Cases, n=1,604 |      | Non cases, n=21,425 |      | NRI   | SE    | Z      | p       |
|------------|----------------|------|---------------------|------|-------|-------|--------|---------|
|            | Up             | Down | Up                  | Down |       |       |        |         |
| Goldenberg | 249            | 11   | 1,013               | 80   | 0.105 | 0.010 | 10.308 | <0.0001 |
| EAARN      | 134            | 32   | 554                 | 220  | 0.048 | 0.008 | 5.899  | <0.0001 |

We assessed the categorical net reclassification improvement of the new score at the clinically relevant 15% risk threshold compared with the Goldenberg and EAARN scores. The new score substantially improved net reclassification. NRI=net reclassification improvement; SE =standard error.

## ONLINE FIGURE 1 Flow Chart

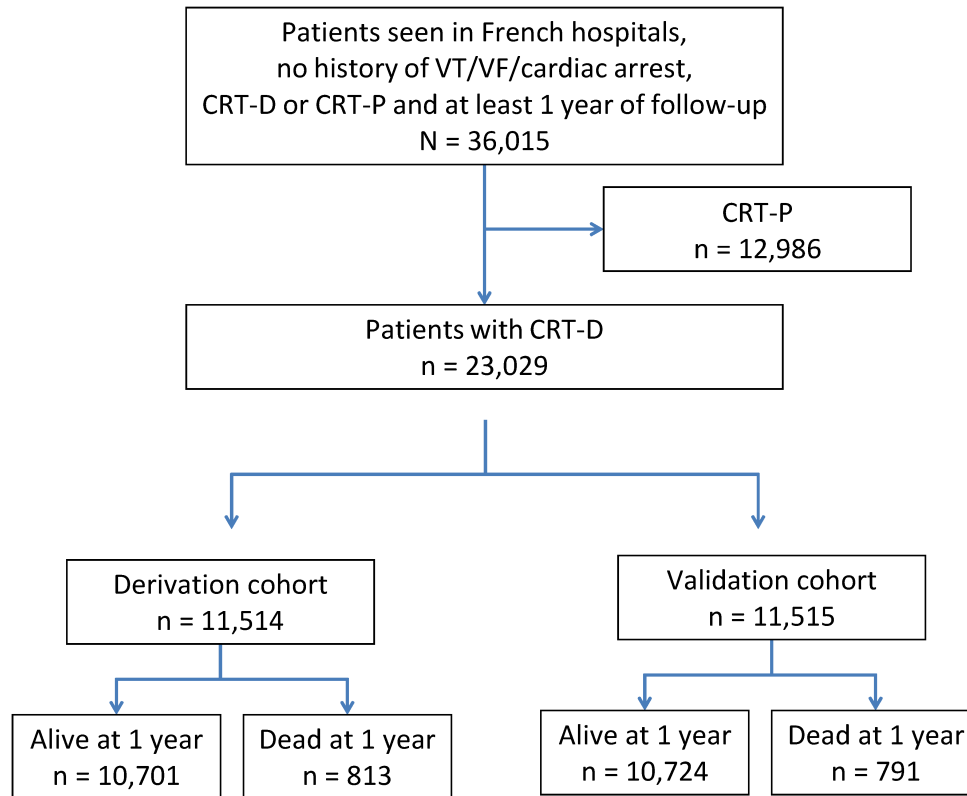

CRT-D = cardiac resynchronization therapy defibrillator; CRT-P = cardiac resynchronization therapy pacemaker; VF = ventricular fibrillation; VT = ventricular tachycardia.

**ONLINE FIGURE 2: Upper panel: Area Under the Curve for the 3 Scores in Predicting Death at 1 Year for Patients With CRT-D Implantation, in the derivation cohort. Lower panel: Decision Curve Analysis: Net Number of True Positives Gained Using Different Models Compared With No Model at a Range of Threshold Probabilities**

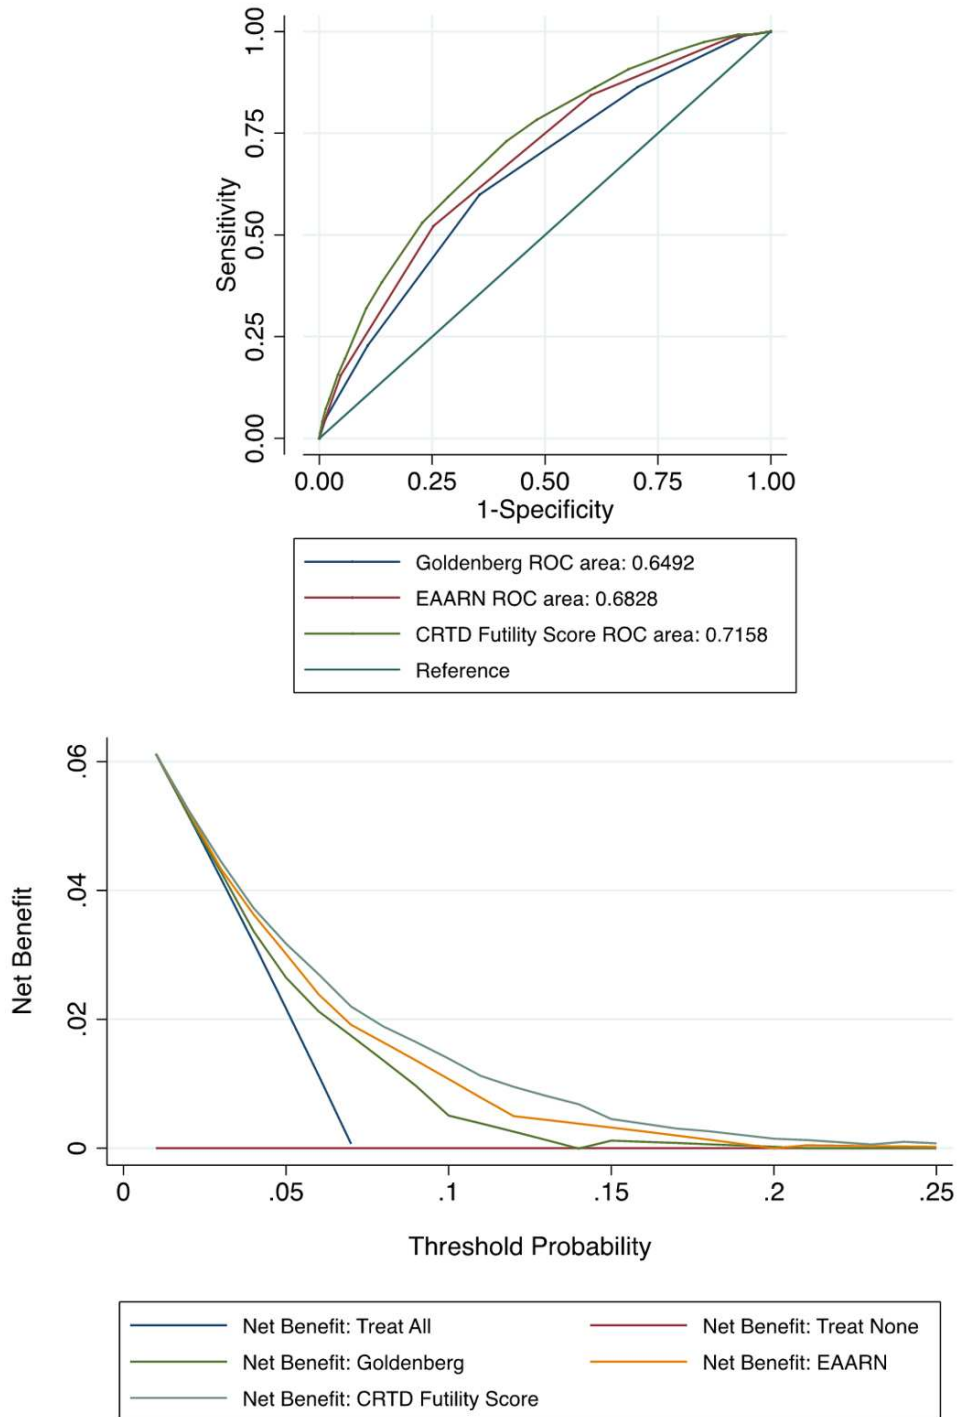

**ONLINE FIGURE 3. Calibration Plots of the 3 Scores Predicting Risk of All-Cause Death During the First Year After CRT-D Implantation in the derivation Cohort Using the Goldenberg Score (Upper Panel), EAARN Score (Lower Left Panel) or CRT-D Futility Score (Lower Right Panel). The diagonal line represents perfect calibration. Vertical bars represent 95% CIs. Abbreviations as in Tables 1 and 2.**

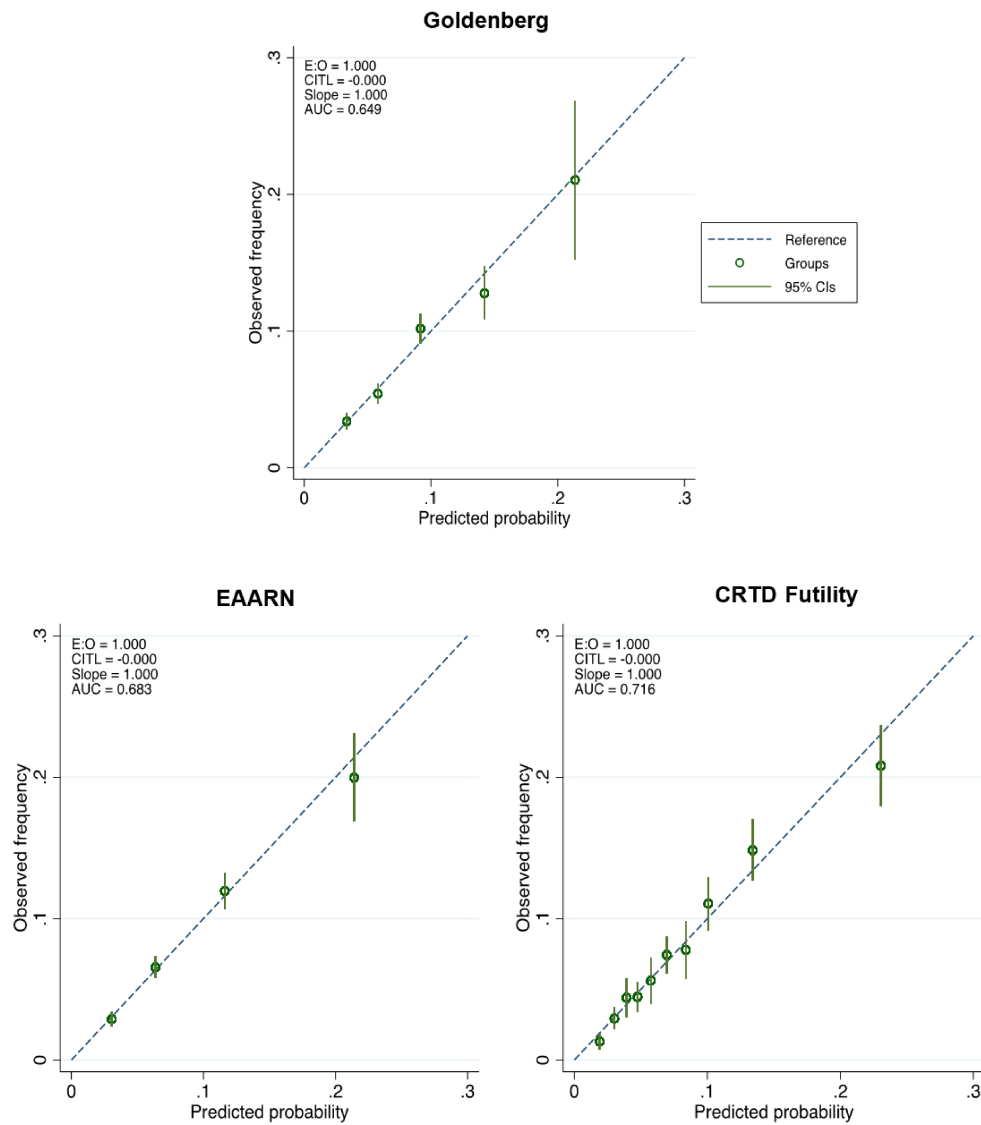

**ONLINE FIGURE 4 Odds Ratio for All-Cause Death at 1 Year in Patients Treated With CRT-D Versus CRT-P, Stratified by CRT-D Futility Score.**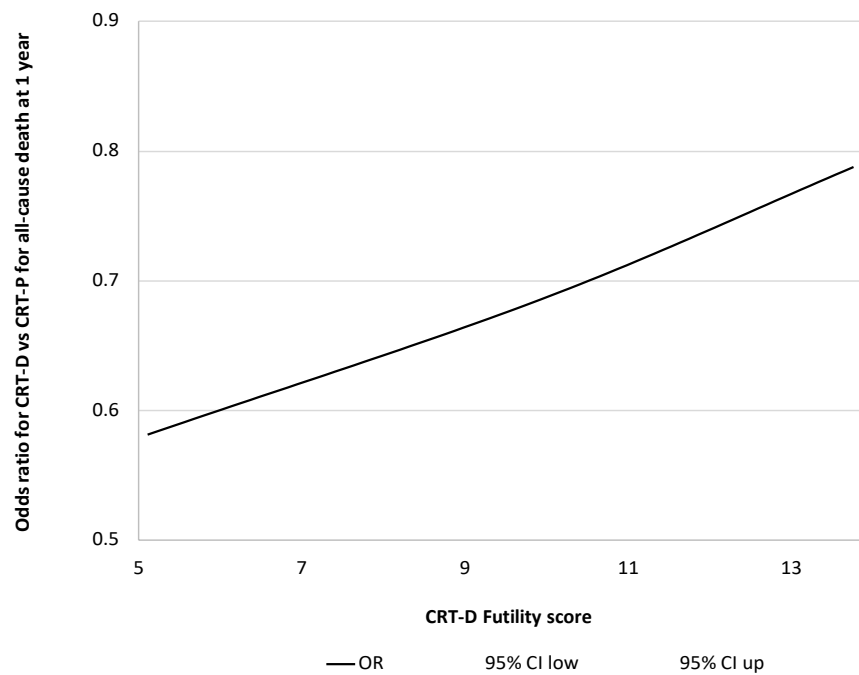

Abbreviations as in Online Table 2.
